# Supplementary material for: Evaluation and modeling of PLA photodegradation under UV irradiation: Bio-based polyester photolysis mechanism
Source: Preprints.org preprint supplement (doi:10.20944/preprints202403.0591.v1), 2024-03-11
Supplement: Supplementary file 1 [file supplementary]

**SUPPLEMENTARY MATERIALS**

*for article*

**Evaluation and modeling of PLA photodegradation under UV irradiation: Bio-based polyester photolysis mechanism**

Sergei Lomakin, Yurii Mikheev, Sergey Usachеv, Svetlana Rogovina, Lubov Zhorina, **Evgeniya** Perepelitsina, **Irina Levina, Olga Kuznetsova, Natalia Shilkina,** Alexey Iordanskii and Alexander Berlin

The procedure of GPC (Gel Permeation Chromatography) peaks’ deconvolution was carried out by means of NETZSCH Peak Separation 2006.01 program employing the nonlinear regression method for asymmetric Mw peaks (Fraser-Suzuki algorithm) [36]. In calculation, the least squares (SLS) reduction was achieved using a hybrid procedure in which the LEVENBERG/MARQUARDT method was combined with step length optimization [J [38].

| a | b |
| --- | --- |
| 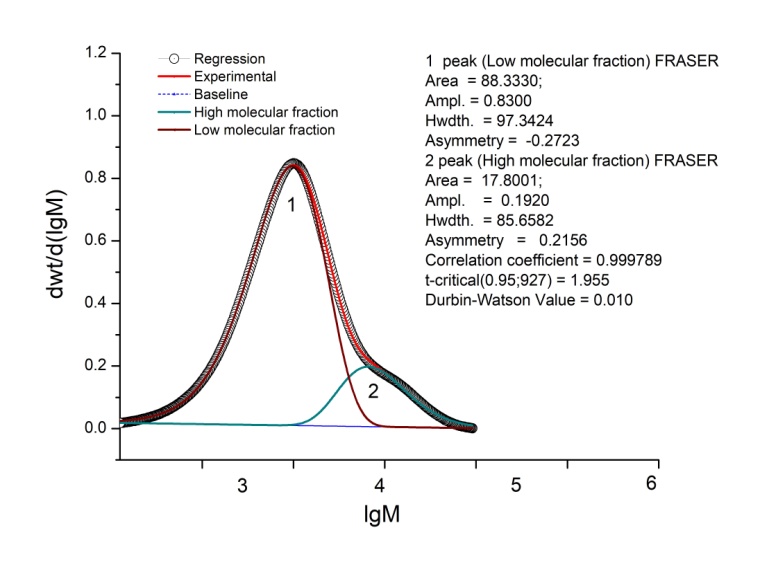 | 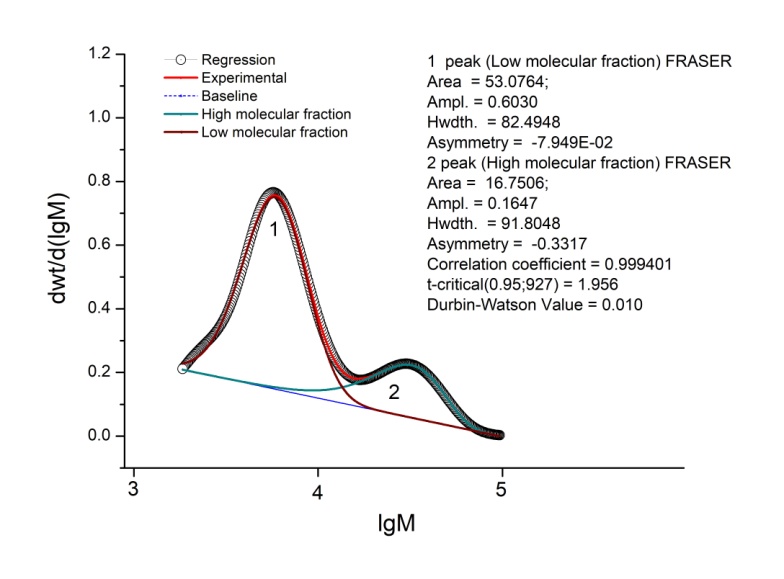 |

Figure S1. Deconvolution results of the ln(Mw) curves for PLA-24 (a) and PLA-144 (b).


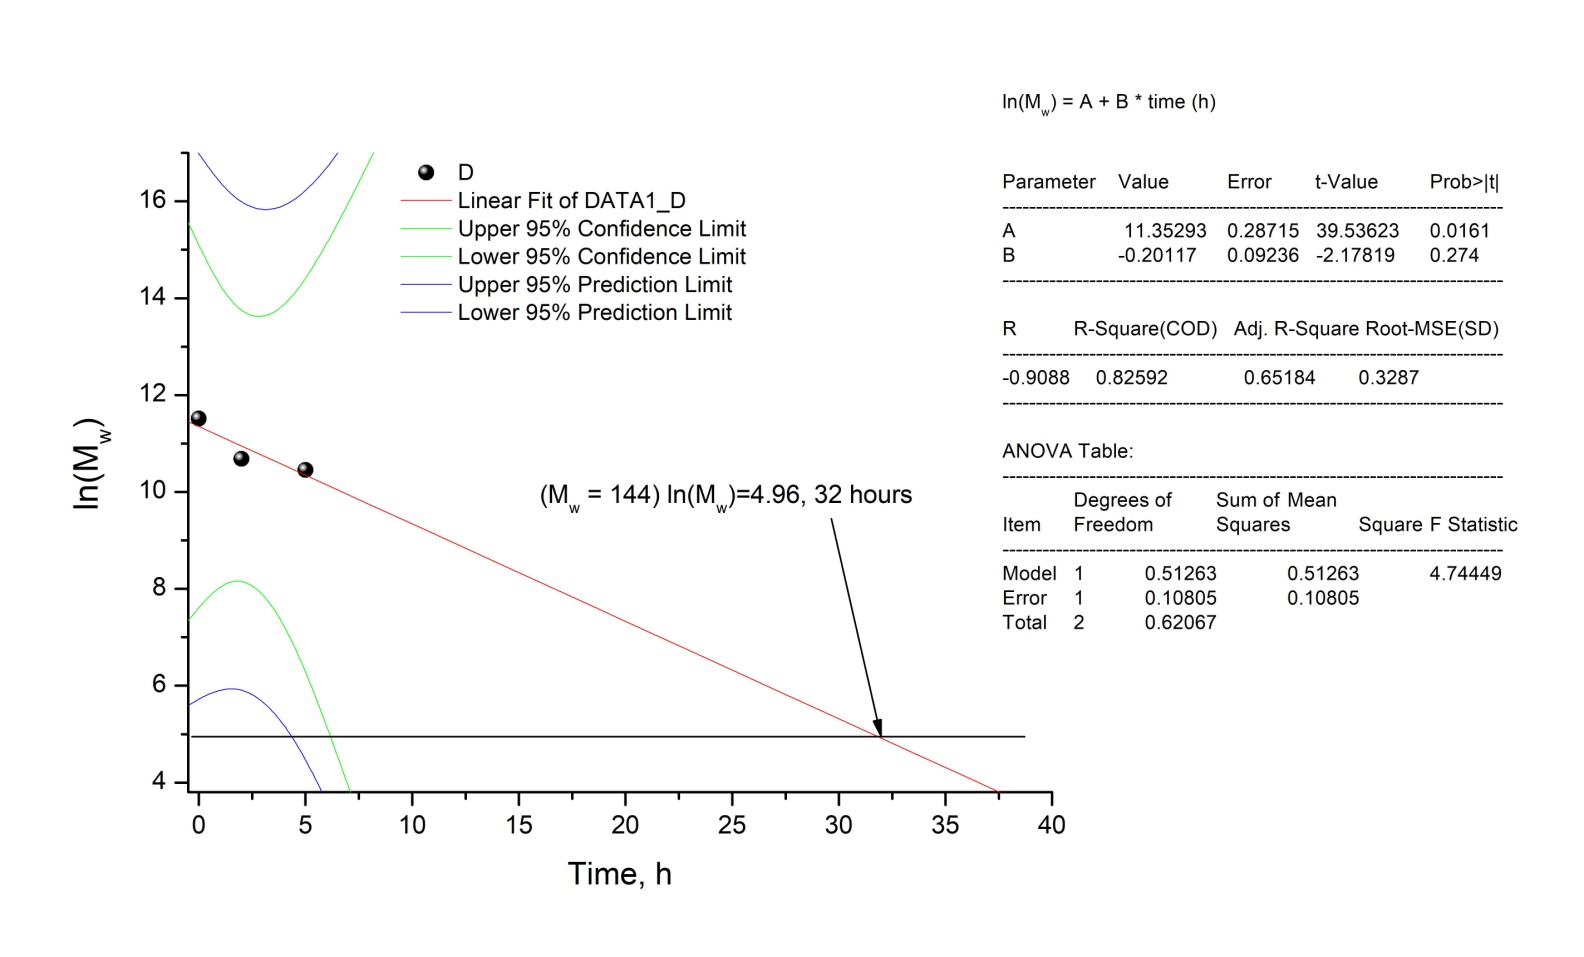


Figure S2. Kinetic analysis of PLA photodegradation.

NMR spectra of initial PLA and PLA after 144 hours of UV irradiation

Figure S3. 1H NMR spectrum of neat PLA (500.18 MHz, CDCl3). *δ* ,ppm: 1,60 (3H, CH3); 5,19 (1H, CH); 4,38 (1H, CH).

Figure S4. 1H NMR spectrum of PLA after 144 hours of UV irradiation (500.18 MHz, CDCl3).

*δ*, ppm: 1.60 (3H, CH3); 5.19 (1H, CH); 4.38 (1H, CH); 5.91, 6.21, 6.52 (CH2=CH-).

500 MHz (H, H) COZY Spectrum of PLA after 144 hours of UV irradiation


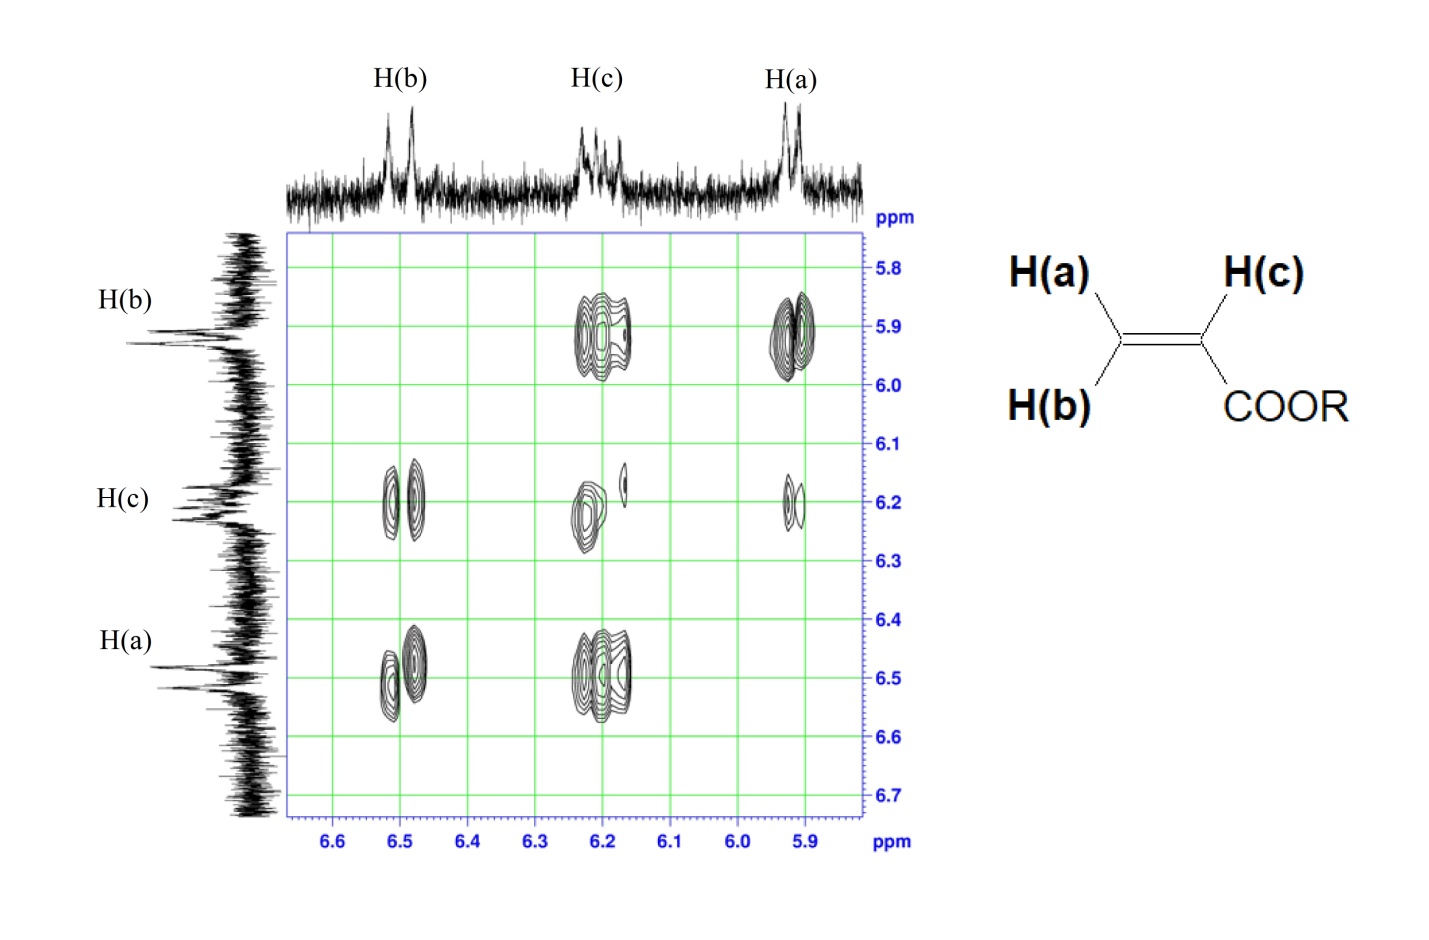


Figure S5.COZY(H, H) spectrum of PLA after 144 hours of UV irradiation. *2J*H(a)H(b)=1.5 Hz, *3J*H(b)H(c)=17,0 Hz and *3J*H(a)H(c) =10.0 Hz.
